# Supplementary material for: Analysis of water level variations in the Huangzhuang reach (Hanjiang River, China) during recent years
Source: Copernicus journal article supplement (doi:10.5194/piahs-383-25-2020), 2020-09-16
Supplement: Supplementary file 1 [file piahs-383-25-2020-supplement.pdf]

Supplement of Proc. IAHS, 383, 25–30, 2020  
<https://doi.org/10.5194/piahs-383-25-2020-supplement>  
© Author(s) 2020. This work is distributed under  
the Creative Commons Attribution 4.0 License.

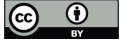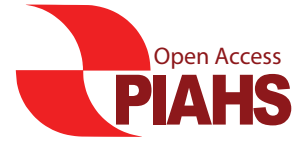

*Supplement of*

## **Analysis of water level variations in the Huangzhuang reach (Hanjiang River, China) during recent years**

**Xiao Xiao et al.**

*Correspondence to:* Bao Qian (jacber@163.com)

The copyright of individual parts of the supplement might differ from the CC BY 4.0 License.

Fig 2 Relationship between annual average daily water levels and corresponding discharge at the Huangzhuang station for the period 2000-2017

| Year | Zmax (m) | O(m <sup>3</sup> /s) | Zmin (m) | O(m <sup>3</sup> /s) |
|------|----------|----------------------|----------|----------------------|
| 2000 | 45,78    | 8340                 | 39,96    | 189                  |
| 2001 | 43,09    | 2020                 | 41,12    | 688                  |
| 2002 | 43,82    | 2920                 | 40,51    | 381                  |
| 2003 | 47,48    | 14600                | 40,4     | 339                  |
| 2004 | 44,57    | 4620                 | 40,99    | 830                  |
| 2005 | 47,36    | 16900                | 41,26    | 920                  |
| 2006 | 43,26    | 2550                 | 40,29    | 535                  |
| 2007 | 45,8     | 8410                 | 40,04    | 425                  |
| 2008 | 45,15    | 7580                 | 40,02    | 340                  |
| 2009 | 44,01    | 4460                 | 40,45    | 623                  |
| 2010 | 47,15    | 13500                | 40,48    | 720                  |
| 2011 | 47,35    | 13900                | 39,9     | 451                  |
| 2012 | 44,1     | 4970                 | 40,17    | 540                  |
| 2013 | 42,51    | 2030                 | 40,09    | 370                  |
| 2014 | 43,15    | 2400                 | 39,73    | 295                  |
| 2015 | 43,75    | 2910                 | 39,98    | 503                  |
| 2016 | 43,28    | 2380                 | 39,94    | 501                  |
| 2017 | 48,62    | 13700                | 39,97    | 507                  |

Fig 3 Surface water fall in different reaches of the Hanjiang River for different discharge ranges and time periods in 2005-2017

**(a) Zhuandouwan~Huangzhuang reach**

| time interval | Under 1000m <sup>3</sup> /s | 1000~5000m <sup>3</sup> /s | 5000~10000m <sup>3</sup> /s | Above 10000m <sup>3</sup> /s |
|---------------|-----------------------------|----------------------------|-----------------------------|------------------------------|
| 2005~2008     | 4,77                        | 4,83                       | 4,95                        | 4,85                         |
| 2009~2013     | 4,84                        | 4,88                       | 4,98                        | 4,77                         |
| 2014~2015     | 4,36                        | 4,35                       |                             |                              |
| 2016~2017     | 4,31                        | 4,12                       | 4,07                        | 3,88                         |

**(b) Huangzhuang~Datong reach**

| time interval | Under 1000m <sup>3</sup> /s | 1000~5000m <sup>3</sup> /s | 5000~10000m <sup>3</sup> /s | Above 10000m <sup>3</sup> /s |
|---------------|-----------------------------|----------------------------|-----------------------------|------------------------------|
| 2005~2008     | 3,13                        | 3,02                       | 2,72                        | 2,38                         |
| 2009~2013     | 2,84                        | 2,82                       | 2,49                        | 2,22                         |
| 2014~2015     | 2,01                        | 2,57                       |                             |                              |
| 2016~2017     | 1,78                        | 2,01                       | 3,01                        | 3,27                         |

**(c) Datong~Shayang reach**

| time interval | Under 1000m <sup>3</sup> /s | 1000~5000m <sup>3</sup> /s | 5000~10000m <sup>3</sup> /s | Above 10000m <sup>3</sup> /s |
|---------------|-----------------------------|----------------------------|-----------------------------|------------------------------|
| 2005~2008     | 3,63                        | 3,61                       | 3,31                        | 3,17                         |
| 2009~2013     | 3,16                        | 3,37                       | 3,32                        | 3,16                         |
| 2014~2015     | 0,63                        | 1,58                       |                             |                              |
| 2016~2017     | 0,84                        | 1,69                       | 3,25                        | 3,14                         |

Fig4 The cross section at the bridge in the Hanjiang River

| 2016     |           | 2012     |           |
|----------|-----------|----------|-----------|
| distance | elevation | distance | elevation |
| 0        | 50        | 0        | 49,9      |
| 33,71708 | 43        | 26,17529 | 44,1      |
| 58,80697 | 43        | 92,11657 | 44        |
| 134,6988 | 44        | 263,9244 | 45        |
| 186,2724 | 44,9      | 505,9986 | 45,6      |
| 335,497  | 45        | 802,4054 | 45,5      |
| 467,1799 | 45,2      | 1008,964 | 45,6      |
| 663,2656 | 45,7      | 1132,846 | 45,1      |
| 844,1602 | 45,5      | 1243,699 | 46        |
| 998,04   | 48,3      | 1395,168 | 46        |
| 1033,511 | 46        | 1517,209 | 45        |
| 1130,874 | 45,5      | 1553,103 | 44        |
| 1297,667 | 45,5      | 1622,821 | 42        |
| 1486,847 | 45        | 1646,571 | 42        |
| 1528,545 | 44        | 1679,444 | 42,29     |
| 1588,499 | 43        | 1683,263 | 39,18     |
| 1675,54  | 42        | 1685,778 | 39        |
| 1685,417 | 39        | 1689,348 | 38        |
| 1690,214 | 39        | 1697,269 | 37        |
| 1698,318 | 39        | 1708,012 | 36        |
| 1704,112 | 39        | 1730,59  | 35        |
| 1718,455 | 39        | 1735,474 | 35        |
| 1749,88  | 39        | 1780,72  | 36        |
| 1783,232 | 39        | 1807,548 | 37        |
| 1813,317 | 39        | 1845,729 | 38        |
| 1834,661 | 39        | 1868,068 | 38        |
| 1941,036 | 38,1      | 1899,382 | 37        |
| 1945,981 | 38        | 1920,728 | 36        |
| 1951,357 | 37        | 1937,799 | 35        |
| 1959,601 | 36        | 1945,52  | 34        |
| 1967,136 | 35        | 1952,985 | 33        |
| 2018,313 | 35        | 1965,778 | 33        |
| 2040,235 | 36        | 1975     | 34        |
| 2062,478 | 37        | 1984,378 | 35        |
| 2101,361 | 37        | 1997,934 | 36        |
| 2111,084 | 36        | 2010,364 | 37        |
| 2120,019 | 35        | 2022,342 | 38        |
| 2133,082 | 34        | 2069,769 | 38,9      |
| 2140,541 | 33        | 2085,915 | 38        |
| 2150,744 | 32        | 2100,886 | 37        |
| 2158,266 | 31        | 2113,915 | 36        |

|          |       |  |          |      |
|----------|-------|--|----------|------|
| 2166,146 | 30    |  | 2121,906 | 35   |
| 2181,532 | 30    |  | 2129,862 | 34   |
| 2196,795 | 31    |  | 2137,436 | 33   |
| 2210,376 | 32    |  | 2143,959 | 32   |
| 2214,032 | 33    |  | 2159,107 | 31   |
| 2217,74  | 34    |  | 2170,533 | 30   |
| 2221,063 | 35    |  | 2180,717 | 29   |
| 2223,373 | 36    |  | 2198,875 | 29   |
| 2225,761 | 37    |  | 2207,263 | 30   |
| 2227,127 | 38    |  | 2220,438 | 31   |
| 2229,296 | 38,2  |  | 2231,22  | 32   |
| 2233,969 | 45,32 |  | 2238,569 | 33   |
| 2271,372 | 43    |  | 2243,553 | 34   |
| 2298,455 | 44    |  | 2247,981 | 35   |
| 2358,188 | 45    |  | 2250,365 | 36   |
| 2371,886 | 50    |  | 2254,527 | 37   |
|          |       |  | 2257,321 | 38   |
|          |       |  | 2259,482 | 39   |
|          |       |  | 2261,759 | 38,9 |
|          |       |  | 2274,206 | 44,1 |
|          |       |  | 2304,287 | 44,1 |
|          |       |  | 2349,667 | 45   |
|          |       |  | 2371,886 | 50   |

Fig5 Impact of construction work in 2016 on the stage-discharge relationship at the Road NO.2 road bridge over of the Hanjiang River in Zhongxiang

| 2016           |                         | 2012  |                         |
|----------------|-------------------------|-------|-------------------------|
| Water level(m) | Flow(m <sup>3</sup> /s) | Water | Flow(m <sup>3</sup> /s) |
| 30,5           | 1,13395431              | 29,5  | 1,267754                |
| 31             | 4,24205552              | 30    | 4,510693                |
| 31,5           | 9,72309949              | 30,5  | 9,737654                |
| 32             | 17,8426995              | 31    | 17,68249                |
| 32,5           | 29,5492319              | 31,5  | 28,68484                |
| 33             | 44,2146853              | 32    | 43,32965                |
| 33,5           | 62,4700092              | 32,5  | 63,80891                |
| 34             | 83,8413587              | 33    | 88,12488                |
| 34,5           | 106,8281                | 33,5  | 108,5483                |
| 35             | 133,431725              | 34    | 141,1119                |
| 35,5           | 137,127799              | 34,5  | 179,4488                |
| 36             | 179,939261              | 35    | 224,0425                |
| 36,5           | 230,198775              | 35,5  | 246,9226                |
| 37             | 289,126652              | 36    | 292,608                 |
| 37,5           | 426,195318              | 36,5  | 361,3571                |
| 38             | 658,695004              | 37    | 445,5112                |
| 38,5           | 792,488025              | 37,5  | 658,2811                |
| 39             | 973,182391              | 38    | 961,2993                |
| 39,5           | 1150,89578              | 38,5  | 1229,705                |
| 40             | 1512,1985               | 39    | 1607,313                |
| 40,5           | 1960,50449              | 39,5  | 2132,452                |
| 41             | 2565,72056              | 40    | 2610,778                |
| 41,5           | 3332,88411              | 40,5  | 3204,519                |
| 42             | 4308,64246              | 41    | 4014,608                |
| 42,5           | 5403,82795              | 41,5  | 5032,332                |
| 43             | 6419,34752              | 42    | 6315,424                |
| 43,5           | 7283,18403              | 42,5  | 7539,992                |
| 44             | 8476,49409              | 43    | 9019,406                |
| 44,5           | 10786,2383              | 43,5  | 10846,31                |
| 45             | 12016,2554              | 44    | 13062,44                |
| 45,5           | 14243,82147             | 44,5  | 14812,772               |
| 46             | 17969,71219             | 45    | 16338,304               |
| 46,5           | 21376,02134             | 45,5  | 18439,404               |
| 47             | 23582,7585              | 46    | 21318,373               |
| 47,5           | 28298,60851             | 46,5  | 24284,782               |
| 48             | 33379,10459             | 47    | 26794,453               |
| 48,5           | 38965,34001             | 47,5  | 32128,9                 |
| 49             | 45135,785               | 48    | 37845,977               |
| 49,5           | 51665,7595              | 48,5  | 43933,818               |
|                |                         | 49    | 50381,985               |
|                |                         | 49,5  | 57181,196               |
